# Supplementary material
Source: PubMed Central journal article supplement (PMC3000682)
Supplement: supp_ddq455_ddq455supp.pdf [file supp_ddq455_ddq455supp.pdf]

## Supplemental Material

**Supplemental Figure 1:** Ets-2 staining in bone tumors from *Prkar1a*<sup>+/-</sup> and *Prkar1a*<sup>+/-</sup> *Prkaca*<sup>+/-</sup> mice and in bone tissue from *Prkaca*<sup>+/-</sup> and WT mice (magnification, x10 and x40).

**Supplemental Figure 2 ETS-1 is strongly expressed in human osteochondromyxomas from Carney complex:** **A.** Human osteochondromyxoma stained by H&E (magnification, x10). **B.** Human osteochondromyxoma displaying a strong immunoreactivity for ETS-1 (magnification, x10 and x20). Cryopyrin (**C**) Caspase-1 (**D**), and IL1B (**E**) expression in human osteochondromyxoma detected by immunostaining (magnification, x10).

**Supplemental Figure 3: Ets-1 and caspase-1 expression are not regulated by regulatory PKA subunits.** Down-regulation of R1 $\alpha$ , R11 $\alpha$  or R11 $\beta$  by specific siRNAs did not modify Ets-1 and caspase-1 protein expression. siRNA knock-down was confirmed by Western blot analysis. All the Western blot experiments were performed in triplicate.

**Supplemental Figure 4 cAMP via PKA regulates Ets-1 and caspase-1 inflammasome:** **A.** Forskolin promoted a significant increase in *Nlrp3*, *Caspase-1* and *Ets-1* expression. PKA inhibitor H89 blocked the increase in the *Nlrp3*, *Caspase-1* and *Ets-1* expression stimulated by cAMP. **B.** Western blot analysis confirmed the increase in Ets-1 and caspase-1 expression stimulated by forskolin. PKA activity inhibitor also

blocked the stimulatory effects of cAMP on Ets-1 and caspase-1 expression at protein levels. Gene expression analysis is presented as mean  $\pm$  SD. Western blot experiments were performed in triplicate.

**Supplemental Table 1:** Genes differentially expressed between NOMID tumor cells compared to NOMID non-lesional cells.

Supplemental Fig. 1

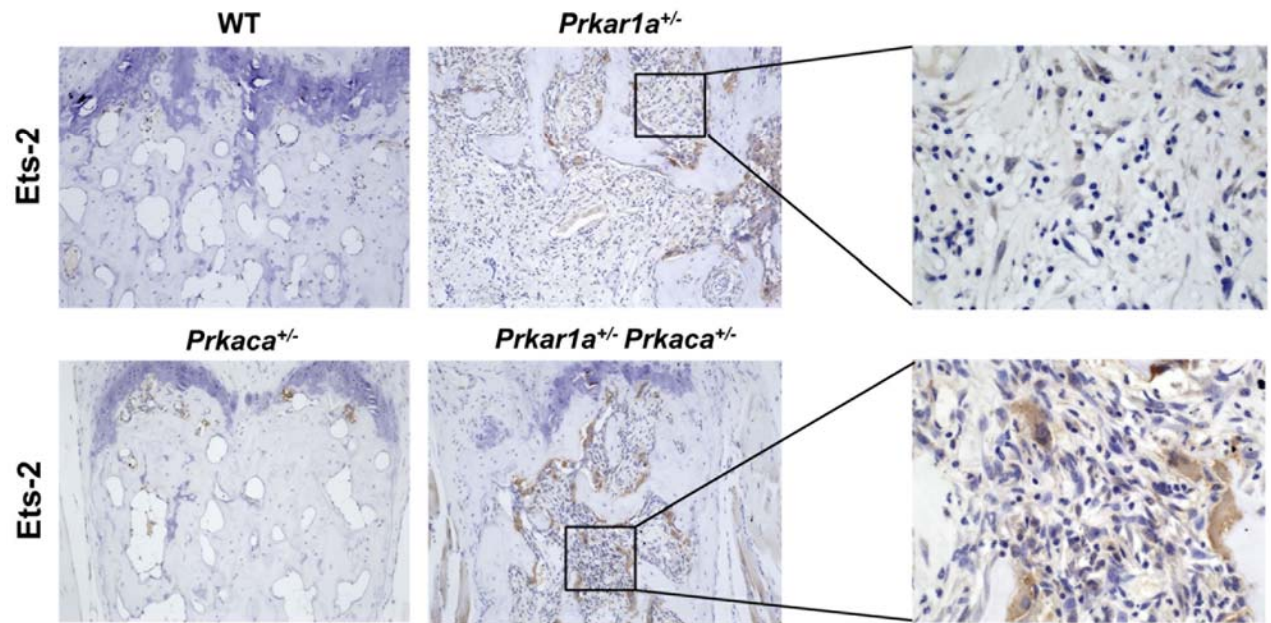

Supplemental Fig. 2

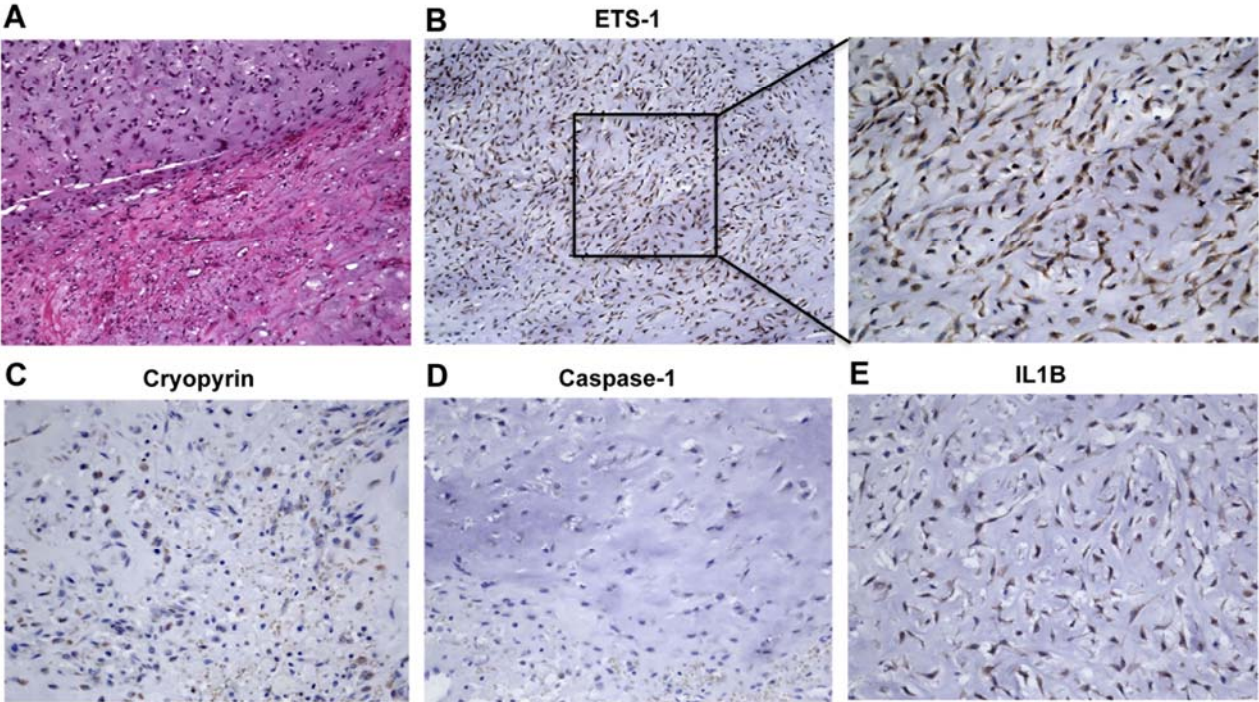

Supplemental Fig. 3

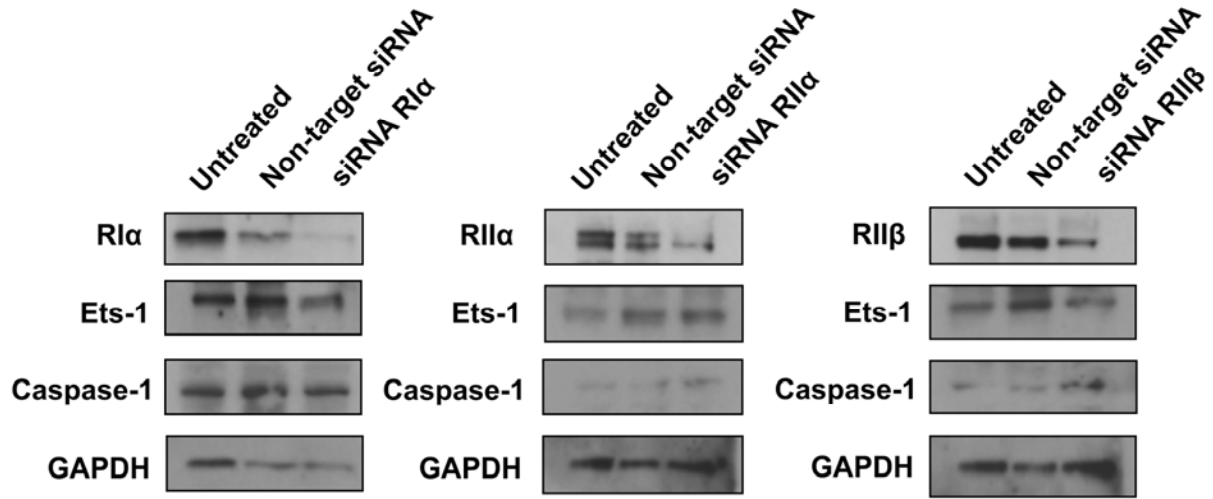

Supplemental Fig. 4

**A**

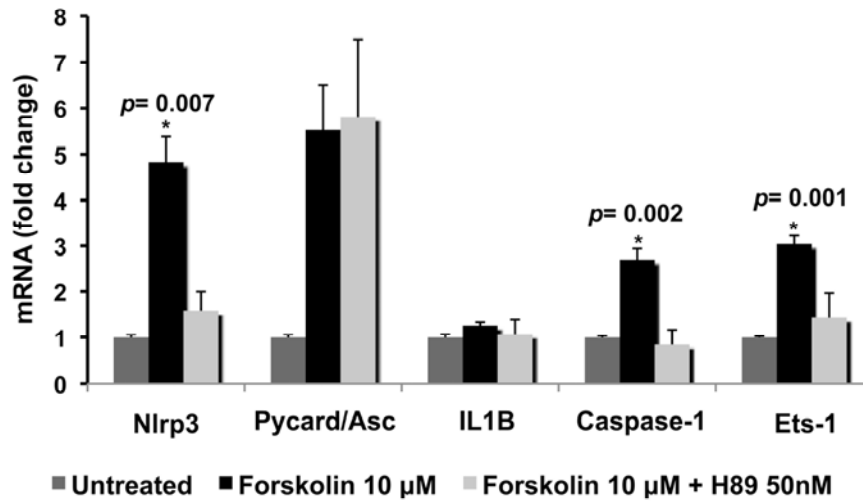

**B**

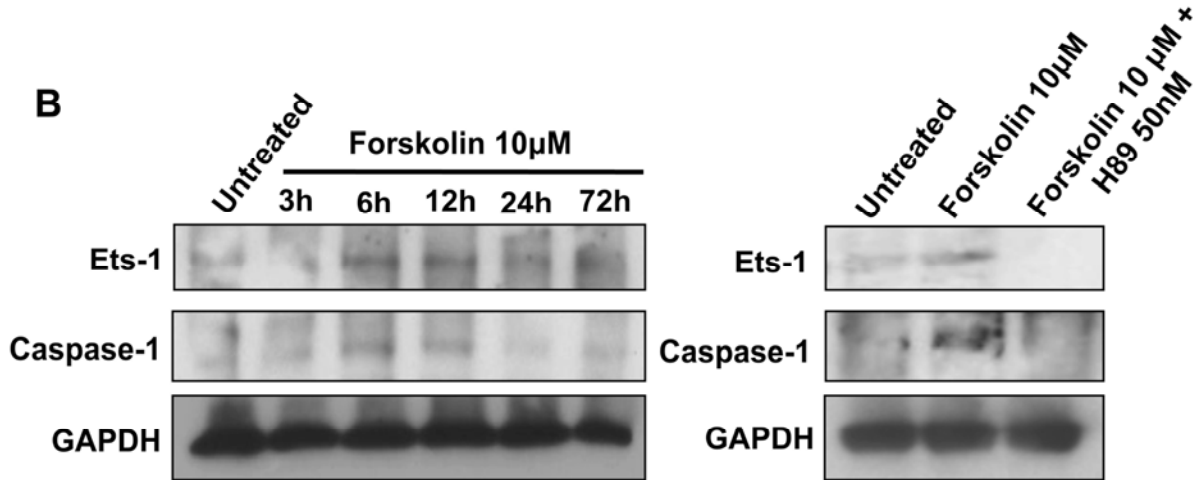

Up-regulated genes

Genes differentially expressed between NOMID tumor cells compared to non-lesional cells.

| PROBE_ID     | SYMBOL    | DEFINITION                              | zSCORE     | p value    |
|--------------|-----------|-----------------------------------------|------------|------------|
| ILMN_1682694 | LOC203547 | Homo sapiens hypothetical protein LO    | 156.938817 | 0.01460227 |
| ILMN_1681703 | FOXO3     | Homo sapiens forkhead box O3 (FOXO      | 134.205139 | 0.01189125 |
| ILMN_1663032 | FNDC4     | Homo sapiens fibronectin type III dom   | 75.5548905 | 0.02778968 |
| ILMN_1810559 | RHOQ      | Homo sapiens ras homolog gene famil     | 53.2847732 | 0.0194943  |
| ILMN_1652749 | ERF       | Homo sapiens Ets2 repressor factor (E   | 43.7134869 | 0.0339902  |
| ILMN_1733756 | COL12A1   | Homo sapiens collagen, type XII, alpha  | 41.2080958 | 0.03376441 |
| ILMN_2406043 | VPS24     | Homo sapiens vacuolar protein sorting   | 37.5033646 | 0.02059451 |
| ILMN_1691926 | HADH2     | Homo sapiens hydroxyacyl-Coenzyme       | 35.493501  | 0.04647442 |
| ILMN_2404063 | APP       | Homo sapiens amyloid beta (A4) precu    | 34.6803203 | 0.0282616  |
| ILMN_1746378 | GHDC      | Homo sapiens GH3 domain containing      | 26.9372998 | 0.00469615 |
| ILMN_1751559 | C16orf30  | Homo sapiens chromosome 16 open r       | 23.4878914 | 0.01711647 |
| ILMN_1716596 | NSMAF     | Homo sapiens neutral sphingomyelina     | 22.5718959 | 0.03684249 |
| ILMN_1711166 | WDR8      | Homo sapiens WD repeat domain 8 (M      | 15.9527182 | 0.03405009 |
| ILMN_1798663 | MAB21L2   | PREDICTED: Homo sapiens mab-21-like     | 15.1719947 | 0.02845314 |
| ILMN_2370976 | FER1L3    | Homo sapiens fer-1-like 3, myoferlin (C | 14.6906521 | 0.0087438  |
| ILMN_1797776 | PRSS23    | Homo sapiens protease, serine, 23 (PR   | 13.8399983 | 0.00820914 |
| ILMN_2061435 | MEG3      | Homo sapiens maternally expressed 3     | 12.4275395 | 0.02966133 |
| ILMN_1660368 | TRRAP     | Homo sapiens transformation/transcri    | 12.3358121 | 0.03446157 |
| ILMN_1681515 | CRLF1     | Homo sapiens cytokine receptor-like fa  | 12.2714031 | 0.00722736 |
| ILMN_1680104 | SLC35C1   | Homo sapiens solute carrier family 35,  | 11.5133136 | 0.01866465 |
| ILMN_1685002 | RCE1      | Homo sapiens RCE1 homolog, prenyl p     | 10.2112164 | 0.00120654 |
| ILMN_1699931 | HCST      | Homo sapiens hematopoietic cell signi   | 9.97775598 | 0.03613521 |
| ILMN_1779034 | NADSYN1   | Homo sapiens NAD synthetase 1 (NAD      | 9.5748428  | 0.00880764 |
| ILMN_1768227 | DCN       | Homo sapiens decorin (DCN), transcrip   | 9.54579223 | 0.00849538 |
| ILMN_1680339 | PDGFRL    | Homo sapiens platelet-derived growth    | 9.41935137 | 0.01350513 |
| ILMN_1661537 | LEPROT    | Homo sapiens leptin receptor overlap    | 9.10294708 | 0.04835232 |
| ILMN_1674620 | SGCE      | Homo sapiens sarcoglycan, epsilon (SG   | 7.59765776 | 0.04994395 |
| ILMN_1690105 | STAT1     | Homo sapiens signal transducer and a    | 7.29758248 | 0.00787046 |
| ILMN_1740466 | FAM46A    | Homo sapiens family with sequence si    | 6.68184283 | 0.02623444 |
| ILMN_1755364 | RALA      | Homo sapiens v-ral simian leukemia vi   | 6.64044628 | 0.04745055 |
| ILMN_2058782 | IFI27     | Homo sapiens interferon, alpha-induci   | 6.63469058 | 0.00985991 |
| ILMN_2403458 | SMARCB1   | Homo sapiens SWI/SNF related, matrix    | 6.56326292 | 0.02859502 |
| ILMN_1697469 | SFRS6     | Homo sapiens splicing factor, arginine, | 6.5155192  | 0.04389685 |
| ILMN_2402392 | COL8A1    | Homo sapiens collagen, type VIII, alph  | 6.38278422 | 0.02585555 |
| ILMN_1698491 | MBD3      | Homo sapiens methyl-CpG binding do      | 6.25652404 | 0.03947417 |
| ILMN_2360229 | MAPKAP1   | Homo sapiens mitogen-activated prote    | 6.21402893 | 0.04096855 |
| ILMN_2068747 | OAT       | Homo sapiens ornithine aminotransfer    | 6.20743857 | 0.03671004 |
| ILMN_1713124 | AKR1C3    | Homo sapiens aldo-keto reductase fan    | 5.70596924 | 0.01096915 |
| ILMN_1800008 | ACAT1     | Homo sapiens acetyl-Coenzyme A ace      | 5.58723701 | 0.04009442 |
| ILMN_1750100 | TUBB4Q    | Homo sapiens tubulin, beta polypeptic   | 5.52053568 | 0.01072605 |
| ILMN_1690342 | LTA4H     | Homo sapiens leukotriene A4 hydrolas    | 5.39390261 | 0.04536949 |
| ILMN_1701441 | LPAR1     | Homo sapiens lysophosphatidic acid re   | 5.36629024 | 0.02970775 |
| ILMN_1728975 | SCO1      | Homo sapiens SCO cytochrome oxidas      | 5.36116552 | 0.04371086 |

|              |           |                                         |            |            |
|--------------|-----------|-----------------------------------------|------------|------------|
| ILMN_2377174 | SYPL1     | Homo sapiens synaptophysin-like 1 (SY   | 5.35531119 | 0.04401473 |
| ILMN_1666482 | SP2       | Homo sapiens Sp2 transcription factor   | 5.16832992 | 0.01788285 |
| ILMN_2141790 | HYOU1     | Homo sapiens hypoxia up-regulated 1     | 5.16451115 | 0.04883687 |
| ILMN_1764629 | SLC39A14  | Homo sapiens solute carrier family 39   | 5.12700533 | 0.03436091 |
| ILMN_1669376 | DRAM      | Homo sapiens damage-regulated auto      | 4.85815433 | 0.01872899 |
| ILMN_1695290 | FERMT2    | Homo sapiens fermitin family homolog    | 4.82307452 | 0.03207433 |
| ILMN_1651229 | IPO13     | Homo sapiens importin 13 (IPO13), m     | 4.75623219 | 0.01620647 |
| ILMN_2148527 | H19       | Homo sapiens H19, imprinted matern      | 4.56840134 | 0.00182734 |
| ILMN_1777325 | STAT1     | Homo sapiens signal transducer and a    | 4.48516875 | 0.00217798 |
| ILMN_1691237 | CAP2      | Homo sapiens CAP, adenylate cyclase-    | 4.44748523 | 0.03970708 |
| ILMN_1789702 | GBE1      | Homo sapiens glucan (1,4-alpha-), bra   | 4.30192224 | 0.0268224  |
| ILMN_1677085 | RGS19     | Homo sapiens regulator of G-protein s   | 4.2574722  | 0.01355423 |
| ILMN_1747744 | LHFPL2    | Homo sapiens lipoma HMGIC fusion pr     | 4.24475574 | 0.00283031 |
| ILMN_2367258 | SMOX      | Homo sapiens spermine oxidase (SMO      | 4.20366996 | 0.00068019 |
| ILMN_1796417 | ASNS      | Homo sapiens asparagine synthetase (    | 4.18543333 | 0.03757355 |
| ILMN_1667030 | HSBP1     | Homo sapiens heat shock factor bindir   | 4.1600241  | 0.00896596 |
| ILMN_1687626 | ZDHHC24   | Homo sapiens zinc finger, DHHC-type c   | 4.11615643 | 0.04332581 |
| ILMN_1712312 | RAB11A    | Homo sapiens RAB11A, member RAS c       | 4.09180748 | 0.04505228 |
| ILMN_1674243 | TFRC      | Homo sapiens transferrin receptor (p9   | 4.06046184 | 0.04951915 |
| ILMN_1802669 | PPP3CB    | Homo sapiens protein phosphatase 3 (    | 3.95695969 | 0.04821562 |
| ILMN_1772459 | RPS23     | Homo sapiens ribosomal protein S23 (    | 3.92642909 | 0.01725593 |
| ILMN_1693039 | ZFPL1     | Homo sapiens zinc finger protein-like 1 | 3.90178591 | 0.04575153 |
| ILMN_1769810 | ARL6IP5   | Homo sapiens ADP-ribosylation-like fa   | 3.83137656 | 0.04290335 |
| ILMN_1681081 | AGPAT2    | Homo sapiens 1-acylglycerol-3-phosph    | 3.79190189 | 0.02634441 |
| ILMN_1685433 | COL8A1    | Homo sapiens collagen, type VIII, alph  | 3.7600651  | 0.00286129 |
| ILMN_1809483 | HSD17B14  | Homo sapiens hydroxysteroid (17-beta    | 3.69055297 | 0.02273824 |
| ILMN_1811313 | SLIT3     | Homo sapiens slit homolog 3 (Drosoph    | 3.68486923 | 0.0071526  |
| ILMN_1729142 | PRR6      | Homo sapiens proline rich 6 (PRR6), m   | 3.54086149 | 0.01861814 |
| ILMN_1726901 | KLC1      | Homo sapiens kinesin light chain 1 (KL  | 3.52292567 | 0.00762866 |
| ILMN_2376953 | KCNK2     | Homo sapiens potassium channel, sub     | 3.51202982 | 0.04059665 |
| ILMN_1770084 | TACC1     | Homo sapiens transforming, acidic coi   | 3.37947677 | 0.03280033 |
| ILMN_1765649 | IRF3      | Homo sapiens interferon regulatory fa   | 3.3716222  | 0.02831593 |
| ILMN_1760490 | ACVR1     | Homo sapiens activin A receptor, type   | 3.37099654 | 0.02799408 |
| ILMN_1773395 | RDH5      | Homo sapiens retinol dehydrogenase 5    | 3.35704708 | 0.00157695 |
| ILMN_1768505 | IL13RA1   | Homo sapiens interleukin 13 receptor,   | 3.35375924 | 0.02609371 |
| ILMN_1769787 | SELO      | Homo sapiens selenoprotein O (SELO),    | 3.34815032 | 0.03575488 |
| ILMN_1701487 | TAOK2     | Homo sapiens TAO kinase 2 (TAOK2), t    | 3.30572521 | 0.02013179 |
| ILMN_1790689 | CRISPLD2  | Homo sapiens cysteine-rich secretory    | 3.26328294 | 0.00603845 |
| ILMN_2256765 | CDC16     | Homo sapiens cell division cycle 16 ho  | 3.25022621 | 0.0052317  |
| ILMN_1672496 | DNAJA1    | Homo sapiens DnaJ (Hsp40) homolog,      | 3.23343304 | 0.04973542 |
| ILMN_1773865 | HSPA5     | Homo sapiens heat shock 70kDa prote     | 3.20876858 | 0.02963857 |
| ILMN_1682099 | TNFAIP8L3 | Homo sapiens tumor necrosis factor, a   | 3.20010896 | 0.04858559 |
| ILMN_1777526 | MED20     | Homo sapiens mediator complex subu      | 3.11581768 | 0.04886488 |
| ILMN_1776723 | PHF11     | Homo sapiens PHD finger protein 11 (f   | 3.08903356 | 0.00514765 |
| ILMN_1684771 | PGRMC1    | Homo sapiens progesterone receptor 1    | 3.07621449 | 0.03341024 |
| ILMN_2057573 | FAM62B    | Homo sapiens family with sequence si    | 3.03409399 | 0.03135743 |



|              |          |                                             |            |            |
|--------------|----------|---------------------------------------------|------------|------------|
| ILMN_1814726 | SCARB2   | Homo sapiens scavenger receptor clas        | 3.00290928 | 0.01486292 |
| ILMN_1795918 | CENTG3   | Homo sapiens centaurin, gamma 3 (CE         | 2.99753501 | 0.04171867 |
| ILMN_2052208 | GADD45A  | Homo sapiens growth arrest and DNA-         | 2.9868311  | 0.03405285 |
| ILMN_1713884 | C16orf42 | Homo sapiens chromosome 16 open r           | 2.98010513 | 0.04628314 |
| ILMN_1773906 | NCOA4    | Homo sapiens nuclear receptor coacti        | 2.97153285 | 0.03522076 |
| ILMN_1726104 | C11orf51 | Homo sapiens chromosome 11 open r           | 2.9643849  | 0.00108914 |
| ILMN_1695917 | C5orf15  | Homo sapiens chromosome 5 open re           | 2.96377095 | 0.00286722 |
| ILMN_1798485 | ATP6V1E1 | Homo sapiens ATPase, H+ transporting        | 2.93292228 | 0.0223707  |
| ILMN_2390162 | PHF11    | Homo sapiens PHD finger protein 11 (f       | 2.92851645 | 0.017755   |
| ILMN_2339796 | CDC16    | Homo sapiens cell division cycle 16 ho      | 2.92125762 | 0.01356856 |
| ILMN_1691364 | STAT1    | Homo sapiens signal transducer and a        | 2.91567766 | 0.00524559 |
| ILMN_1705849 | SPR      | Homo sapiens sepiapterin reductase (        | 2.91331559 | 0.01693828 |
| ILMN_1792508 | TMEM59   | Homo sapiens transmembrane proteir          | 2.90956436 | 0.04183208 |
| ILMN_2143261 | CXorf40B | Homo sapiens chromosome X open re           | 2.9062443  | 0.03104119 |
| ILMN_2216637 | STK32B   | Homo sapiens serine/threonine kinase        | 2.88249481 | 0.00111754 |
| ILMN_2148459 | B2M      | Homo sapiens beta-2-microglobulin (B        | 2.8588819  | 0.0145705  |
| ILMN_2365711 |          | 3-Sep Homo sapiens septin 2 (SEPT2), transc | 2.85475848 | 0.02952066 |
| ILMN_1651347 | SERTAD2  | Homo sapiens SERTA domain containir         | 2.83728432 | 0.03212655 |
| ILMN_1745964 | IRAK2    | Homo sapiens interleukin-1 receptor-a       | 2.83509922 | 0.03874169 |
| ILMN_1660691 | RAB31    | Homo sapiens RAB31, member RAS or           | 2.81921309 | 0.04586547 |
| ILMN_2128428 | DAB2     | Homo sapiens disabled homolog 2, mi         | 2.79245924 | 0.0309434  |
| ILMN_1724789 | CD59     | Homo sapiens CD59 molecule, comple          | 2.77984085 | 0.0436181  |
| ILMN_2049536 | TRPV2    | Homo sapiens transient receptor pote        | 2.77156573 | 0.00090194 |
| ILMN_2087692 | CYBRD1   | Homo sapiens cytochrome b reductase         | 2.75799316 | 0.04777333 |
| ILMN_1738401 | FOXC1    | Homo sapiens forkhead box C1 (FOXC1         | 2.74110093 | 0.00791219 |
| ILMN_1705151 | SF3A3    | Homo sapiens splicing factor 3a, subur      | 2.73853337 | 0.03466088 |
| ILMN_1717099 | DSCR3    | Homo sapiens Down syndrome critical         | 2.73739104 | 0.03205917 |
| ILMN_1780937 | MUS81    | Homo sapiens MUS81 endonuclease h           | 2.73113305 | 0.00783177 |
| ILMN_1655469 | TSPAN3   | Homo sapiens tetraspanin 3 (TSPAN3),        | 2.7288183  | 0.03696634 |
| ILMN_2338963 | SLC29A1  | Homo sapiens solute carrier family 29       | 2.71642235 | 0.00529268 |
| ILMN_2058795 | PGCP     | Homo sapiens plasma glutamate carbc         | 2.71580964 | 0.03463465 |
| ILMN_2408683 | PPAP2B   | Homo sapiens phosphatidic acid phos         | 2.70995035 | 0.04458256 |
| ILMN_1770732 | COPS3    | Homo sapiens COP9 constitutive phot         | 2.70722788 | 0.0418981  |
| ILMN_1670796 | EXOSC10  | Homo sapiens exosome component 10           | 2.69560456 | 0.04196184 |
| ILMN_1722798 | PLCD3    | Homo sapiens phospholipase C, delta         | 2.6858166  | 0.03990318 |
| ILMN_1695271 | RPP25    | Homo sapiens ribonuclease P/MRP 25          | 2.67885408 | 0.01943574 |
| ILMN_1654939 | TMED2    | Homo sapiens transmembrane emp24            | 2.67288796 | 0.04107902 |
| ILMN_1714327 | SETD1A   | Homo sapiens SET domain containing          | 2.65914121 | 0.03320006 |
| ILMN_1746888 | PCOLCE2  | Homo sapiens procollagen C-endopep          | 2.64848979 | 0.02143633 |
| ILMN_1697268 | EMILIN2  | Homo sapiens elastin microfibril interf     | 2.62223081 | 0.01152729 |
| ILMN_1778177 | ZNF207   | Homo sapiens zinc finger protein 207 (      | 2.61392817 | 0.03210102 |
| ILMN_1806692 | HEXB     | Homo sapiens hexosaminidase B (beta         | 2.61301562 | 0.0231066  |
| ILMN_1809417 | LRFN4    | Homo sapiens leucine rich repeat and        | 2.57622503 | 0.01827767 |
| ILMN_2384241 | TGFBR2   | Homo sapiens transforming growth fa         | 2.56597589 | 0.03262294 |
| ILMN_1746013 | SPOCK1   | Homo sapiens sparc/osteonectin, cw          | 2.56242576 | 0.02024938 |
| ILMN_1815306 | AP2A1    | Homo sapiens adaptor-related protein        | 2.54327344 | 0.02626545 |

|              |           |                                        |            |            |
|--------------|-----------|----------------------------------------|------------|------------|
| ILMN_1675055 | C1orf166  | Homo sapiens chromosome 1 open re      | 2.54061482 | 0.00411139 |
| ILMN_1657744 | C15orf17  | Homo sapiens chromosome 15 open r      | 2.53536206 | 0.0200759  |
| ILMN_1702501 | RPS6KA2   | Homo sapiens ribosomal protein S6 kii  | 2.53269563 | 0.00902454 |
| ILMN_2338997 | PTP4A2    | Homo sapiens protein tyrosine phosph   | 2.52179656 | 0.03681718 |
| ILMN_1706376 | OSBP      | Homo sapiens oxysterol binding protei  | 2.51271371 | 0.04093468 |
| ILMN_1713756 | GLUD1     | Homo sapiens glutamate dehydrogena     | 2.51015642 | 0.00400285 |
| ILMN_1782015 | FCRLB     | Homo sapiens Fc receptor-like B (FCRL  | 2.4832742  | 0.04518617 |
| ILMN_1729596 | C14orf151 | Homo sapiens chromosome 14 open r      | 2.46437211 | 0.01654509 |
| ILMN_1770048 | DPH5      | Homo sapiens DPH5 homolog (S. cerev    | 2.43976296 | 0.02335872 |
| ILMN_2320850 | UBE2D3    | Homo sapiens ubiquitin-conjugating ei  | 2.43712524 | 0.03860644 |
| ILMN_1769282 | FRMD6     | Homo sapiens FERM domain containin     | 2.434501   | 0.03436372 |
| ILMN_2343278 | PPAP2A    | Homo sapiens phosphatidic acid phosph  | 2.40471597 | 0.0297747  |
| ILMN_1673639 | ABI3BP    | Homo sapiens ABI gene family, membe    | 2.38763777 | 0.02187308 |
| ILMN_2339779 | ATP6V1E1  | Homo sapiens ATPase, H+ transporting   | 2.38643138 | 0.03615983 |
| ILMN_2186806 | HLA-F     | Homo sapiens major histocompatibilit   | 2.3849213  | 0.03700994 |
| ILMN_1808333 | PPP1R7    | Homo sapiens protein phosphatase 1,    | 2.38349706 | 0.01421979 |
| ILMN_1681812 | HIF1AN    | Homo sapiens hypoxia-inducible facto   | 2.38204193 | 0.01594383 |
| ILMN_1668639 | TBC1D10B  | Homo sapiens TBC1 domain family, me    | 2.37772725 | 0.00197117 |
| ILMN_1711289 | GYS1      | Homo sapiens glycogen synthase 1 (m    | 2.3697336  | 0.04230561 |
| ILMN_1718285 | HOXC8     | Homo sapiens homeobox C8 (HOXC8),      | 2.36280292 | 0.00304523 |
| ILMN_1764709 | MAFB      | Homo sapiens v-maf musculoaponeuri     | 2.3614794  | 0.00328319 |
| ILMN_1685703 | ACOX2     | Homo sapiens acyl-Coenzyme A oxida     | 2.36020668 | 0.00400817 |
| ILMN_2064694 | STIM1     | Homo sapiens stromal interaction mol   | 2.35597179 | 0.00555887 |
| ILMN_1692664 | PRR5      | Homo sapiens proline rich 5 (renal) (P | 2.35000623 | 0.04317773 |
| ILMN_2347145 | DCN       | Homo sapiens decorin (DCN), transcrip  | 2.31124224 | 0.01465079 |
| ILMN_1669046 | FOXQ1     | Homo sapiens forkhead box Q1 (FOXQ     | 2.3045984  | 0.00091917 |
| ILMN_2326591 | ANXA6     | Homo sapiens annexin A6 (ANXA6), tra   | 2.2952442  | 0.01256085 |
| ILMN_1651735 | TGOLN2    | Homo sapiens trans-golgi network pro   | 2.29522206 | 0.02926964 |
| ILMN_1658800 | BRPF3     | Homo sapiens bromodomain and PHD       | 2.28065456 | 0.03445859 |
| ILMN_1788024 | PCID2     | Homo sapiens PCI domain containing     | 2.2665585  | 0.03765289 |
| ILMN_1767253 | RRP12     | Homo sapiens ribosomal RNA processi    | 2.26489559 | 0.00092979 |
| ILMN_1804789 | KIAA1967  | Homo sapiens KIAA1967 (KIAA1967), t    | 2.26328488 | 0.0042712  |
| ILMN_1651788 | MAP3K11   | Homo sapiens mitogen-activated prote   | 2.23948467 | 0.0453007  |
| ILMN_1732612 | SHB       | Homo sapiens Src homology 2 domain     | 2.23460765 | 0.03309781 |
| ILMN_1704446 | SLC6A10P  | Homo sapiens solute carrier family 6 ( | 2.2262363  | 0.04441022 |
| ILMN_1731745 | NINJ2     | Homo sapiens ninjurin 2 (NINJ2), mRN   | 2.21051362 | 0.03962523 |
| ILMN_1706015 | FAM43A    | Homo sapiens family with sequence si   | 2.20707708 | 0.02287497 |
| ILMN_1747451 | PLCXD1    | Homo sapiens phosphatidylinositol-sp   | 2.1998109  | 0.04873765 |
| ILMN_1815130 | MICALL1   | Homo sapiens MICAL-like 1 (MICALL1)    | 2.18475856 | 0.01560541 |
| ILMN_1664931 | GTF2E2    | Homo sapiens general transcription fa  | 2.17868992 | 0.02755253 |
| ILMN_1811551 | DERA      | Homo sapiens 2-deoxyribose-5-phosph    | 2.17481501 | 0.01959339 |
| ILMN_1672295 | ZC3H12A   | Homo sapiens zinc finger CCCH-type c   | 2.16482733 | 0.04952488 |
| ILMN_2163873 | FNDC1     | Homo sapiens fibronectin type III dom  | 2.14720053 | 0.03531606 |
| ILMN_1690653 | CDK2AP2   | Homo sapiens CDK2-associated protei    | 2.13982326 | 0.04984472 |
| ILMN_1720998 | CA12      | Homo sapiens carbonic anhydrase XII (  | 2.13120968 | 0.04425522 |
| ILMN_1667692 | PTGIS     | Homo sapiens prostaglandin I2 (prosta  | 2.12782418 | 0.01320731 |

|              |         |                                         |            |            |
|--------------|---------|-----------------------------------------|------------|------------|
| ILMN_2363065 | RTN3    | Homo sapiens reticulon 3 (RTN3), tran   | 2.12339315 | 0.00436618 |
| ILMN_1798360 | CXCR7   | Homo sapiens chemokine (C-X-C motif     | 2.11704238 | 0.0239774  |
| ILMN_1707727 | ANGPTL4 | Homo sapiens angiopoietin-like 4 (ANC   | 2.11650401 | 0.0184204  |
| ILMN_1780671 | PLEKHG3 | Homo sapiens pleckstrin homology do     | 2.09764183 | 0.01186083 |
| ILMN_1766657 | STOM    | Homo sapiens stomatin (STOM), transi    | 2.09185634 | 0.02759413 |
| ILMN_1790549 | TSPAN3  | Homo sapiens tetraspanin 3 (TSPAN3),    | 2.09093582 | 0.0463226  |
| ILMN_2076463 | SLC15A4 | Homo sapiens solute carrier family 15,  | 2.05417966 | 0.00585403 |
| ILMN_1652163 | DVL2    | Homo sapiens dishevelled, dsh homok     | 2.04084286 | 0.04529209 |
| ILMN_1740160 | PLCG1   | Homo sapiens phospholipase C, gamm      | 2.03339342 | 0.03085415 |
| ILMN_1810289 | FER1L3  | Homo sapiens fer-1-like 3, myoferlin (C | 2.02703599 | 0.04144313 |
| ILMN_1752197 | PDDC1   | Homo sapiens Parkinson disease 7 dor    | 2.02142303 | 0.02331397 |

Down-regulated genes

Genes differentially expressed between NOMID tumor cells compared to non-lesional cells.

| PROBE_ID     | SYMBOL   | DEFINITION                              | zSCORE      | p value    |
|--------------|----------|-----------------------------------------|-------------|------------|
| ILMN_1801600 | CCDC97   | Homo sapiens coiled-coil domain cont    | -163.720106 | 0.01993372 |
| ILMN_2367469 | CARS     | Homo sapiens cysteinyl-tRNA syntheta    | -108.808141 | 0.04046624 |
| ILMN_1713751 | ADAM19   | Homo sapiens ADAM metallopeptidase      | -79.4405558 | 0.0060249  |
| ILMN_1715273 | PICALM   | Homo sapiens phosphatidylinositol bin   | -66.8861025 | 0.04068139 |
| ILMN_2192620 | LOC90379 | Homo sapiens hypothetical protein BC    | -63.4639423 | 0.01954419 |
| ILMN_1795419 | C2orf24  | Homo sapiens chromosome 2 open rea      | -63.2777038 | 0.00368289 |
| ILMN_1747775 | STX2     | Homo sapiens syntaxin 2 (STX2), transc  | -59.6633183 | 0.02533913 |
| ILMN_1773847 | DYNC112  | Homo sapiens dynein, cytoplasmic 1, ir  | -47.6253478 | 0.04085034 |
| ILMN_2313821 | AIFM1    | Homo sapiens apoptosis-inducing factr   | -30.2490692 | 0.01492358 |
| ILMN_1725510 | DHCR24   | Homo sapiens 24-dehydrocholesterol r    | -25.7702446 | 0.00431328 |
| ILMN_1709590 | PGM5     | Homo sapiens phosphoglucomutase 5       | -20.3276704 | 0.00107363 |
| ILMN_2320964 | ADAR     | Homo sapiens adenosine deaminase, F     | -16.8190612 | 0.02303907 |
| ILMN_1781388 | PGM5     | Homo sapiens phosphoglucomutase 5       | -16.7337213 | 0.00021778 |
| ILMN_1776464 | PARP4    | Homo sapiens poly (ADP-ribose) polym    | -14.5018123 | 0.00819301 |
| ILMN_1738558 | RGS20    | Homo sapiens regulator of G-protein si  | -13.6731094 | 0.00170421 |
| ILMN_1765858 | CAB39    | Homo sapiens calcium binding protein    | -13.3445104 | 0.04386949 |
| ILMN_1673522 | MOCOS    | Homo sapiens molybdenum cofactor s      | -12.0164958 | 6.2025E-05 |
| ILMN_1676448 | WDFY1    | Homo sapiens WD repeat and FYVE do      | -12.0011484 | 0.029735   |
| ILMN_2224907 | C4orf34  | Homo sapiens chromosome 4 open rea      | -11.814511  | 0.01177227 |
| ILMN_1813641 | C9orf167 | Homo sapiens chromosome 9 open rea      | -9.8071185  | 0.00275405 |
| ILMN_1727389 | CDC16    | Homo sapiens cell division cycle 16 hor | -9.73133173 | 0.0126164  |
| ILMN_2223941 | FBLN5    | Homo sapiens fibulin 5 (FBLN5), mRNA    | -9.51460016 | 0.00174643 |
| ILMN_1781516 | SUPT16H  | Homo sapiens suppressor of Ty 16 hor    | -8.55110598 | 0.02802383 |
| ILMN_1784238 | SEC22B   | Homo sapiens SEC22 vesicle trafficking  | -8.32730893 | 0.03427239 |
| ILMN_1676088 | MSRB3    | Homo sapiens methionine sulfoxide re    | -6.91682318 | 0.0268988  |
| ILMN_1702503 | ALDH3A1  | Homo sapiens aldehyde dehydrogenas      | -6.87630172 | 0.01971185 |
| ILMN_2111932 | SERINC2  | Homo sapiens serine incorporator 2 (SI  | -6.86256966 | 0.00099074 |
| ILMN_1773073 | PHYH     | Homo sapiens phytanoyl-CoA 2-hydrox     | -6.83442586 | 0.01732293 |
| ILMN_2087528 | CPSF3    | Homo sapiens cleavage and polyadeny     | -6.04330586 | 0.03718374 |
| ILMN_1740185 | TPMT     | Homo sapiens thiopurine S-methyltran    | -5.94360886 | 0.01530962 |
| ILMN_1729976 | ZNF828   | Homo sapiens zinc finger protein 828 (  | -5.6959163  | 0.02773163 |
| ILMN_1685371 | SUMF2    | Homo sapiens sulfatase modifying fact   | -5.65544471 | 0.0132514  |
| ILMN_1683194 | DCN      | Homo sapiens decorin (DCN), transcrip   | -5.50611237 | 0.01642347 |
| ILMN_1814122 | MDC1     | Homo sapiens mediator of DNA damag      | -5.27724592 | 0.01833795 |
| ILMN_1703374 | NAV1     | Homo sapiens neuron navigator 1 (NAV    | -5.2621507  | 0.04028125 |
| ILMN_1732176 | AGPAT2   | Homo sapiens 1-acylglycerol-3-phosph    | -4.96806    | 0.04871727 |
| ILMN_1758938 | SLC31A2  | Homo sapiens solute carrier family 31   | -4.88515794 | 0.03328852 |
| ILMN_1810100 | PBX3     | Homo sapiens pre-B-cell leukemia hor    | -4.86077414 | 0.02799261 |
| ILMN_1795906 | PCBD1    | Homo sapiens pterin-4 alpha-carbinola   | -4.84410149 | 0.02884897 |
| ILMN_1780698 | ZFYVE19  | Homo sapiens zinc finger, FYVE domair   | -4.70578705 | 0.04481786 |
| ILMN_1746968 | PHF1     | Homo sapiens PHD finger protein 1 (PH   | -4.68462761 | 0.01870963 |
| ILMN_1665455 | DCUN1D3  | Homo sapiens DCN1, defective in cullir  | -4.63392884 | 0.02419159 |
| ILMN_1747067 | NPAS1    | Homo sapiens neuronal PAS domain pr     | -4.49545909 | 0.04472015 |

|              |         |                                         |             |            |
|--------------|---------|-----------------------------------------|-------------|------------|
| ILMN_1737833 | ATN1    | Homo sapiens atrophin 1 (ATN1), trans   | -4.47862565 | 0.04140988 |
| ILMN_1741942 | STX16   | Homo sapiens syntaxin 16 (STX16), tra   | -4.46532113 | 0.02845955 |
| ILMN_2108709 | ANKRD11 | Homo sapiens ankyrin repeat domain 1    | -4.4361258  | 0.01125866 |
| ILMN_1815190 | METTL1  | Homo sapiens methyltransferase like 1   | -4.27524284 | 0.04266124 |
| ILMN_1719972 | PLXNA3  | Homo sapiens plexin A3 (PLXNA3), mR     | -4.16374952 | 0.01559555 |
| ILMN_2395043 | HSPA4   | Homo sapiens heat shock 70kDa protei    | -4.10388392 | 0.0368255  |
| ILMN_1703379 | VPS41   | Homo sapiens vacuolar protein sorting   | -3.48610771 | 0.03737295 |
| ILMN_1654851 | FAM134A | Homo sapiens family with sequence sir   | -3.44289622 | 0.00350905 |
| ILMN_1741204 | KLHDC2  | Homo sapiens kelch domain containin     | -3.08995651 | 0.02123893 |
| ILMN_2289924 | TRAK1   | Homo sapiens trafficking protein, kines | -3.03573802 | 0.04667353 |
| ILMN_1755862 | PFAS    | Homo sapiens phosphoribosylformylgl     | -2.97210618 | 0.02751967 |
| ILMN_1775380 | SMOX    | Homo sapiens spermine oxidase (SMO)     | -2.95115105 | 0.04642094 |
| ILMN_2399174 | TRAK1   | Homo sapiens trafficking protein, kines | -2.94435785 | 0.00255331 |
| ILMN_1671911 | MTA1    | Homo sapiens metastasis associated 1    | -2.94180936 | 0.02462126 |
| ILMN_1746598 | SCNM1   | Homo sapiens sodium channel modifie     | -2.90953873 | 0.02497205 |
| ILMN_1760121 | RRAGC   | Homo sapiens Ras-related GTP binding    | -2.79269257 | 0.02496921 |
| ILMN_1733851 | DACT3   | Homo sapiens dapper, antagonist of be   | -2.76179724 | 0.03657785 |
| ILMN_1739161 | PPAP2A  | Homo sapiens phosphatidic acid phosph   | -2.55637273 | 0.0012587  |
| ILMN_2364062 | THOC4   | Homo sapiens THO complex 4 (THOC4)      | -2.54650576 | 0.02661255 |
| ILMN_2380163 | PTPRF   | Homo sapiens protein tyrosine phosph    | -2.48607124 | 0.00987093 |
| ILMN_2096322 | ADIPOR1 | Homo sapiens adiponectin receptor 1 (   | -2.40542228 | 0.04006284 |
| ILMN_1768480 | VGLL4   | Homo sapiens vestigial like 4 (Drosophi | -2.37480654 | 0.03597793 |
| ILMN_1718977 | GADD45B | Homo sapiens growth arrest and DNA-     | -2.33254206 | 0.02882668 |
| ILMN_1729495 | TRIM41  | Homo sapiens tripartite motif-containi  | -2.31059072 | 0.01535558 |
| ILMN_1678957 | WDR55   | Homo sapiens WD repeat domain 55 (W     | -2.2997774  | 0.04080737 |
| ILMN_1796912 | ARHGEF7 | Homo sapiens Rho guanine nucleotide     | -2.25785346 | 0.04882943 |
| ILMN_1667068 | ZC3HAV1 | Homo sapiens zinc finger CCCH-type, a   | -2.18114617 | 0.02010903 |
| ILMN_1740426 | RASD1   | Homo sapiens RAS, dexamethasone-in      | -2.16851263 | 0.00661928 |
| ILMN_1739008 | ATG9A   | Homo sapiens ATG9 autophagy related     | -2.05421339 | 0.02038962 |

| Category     | Term                               | Count | %      | P Value | Genes                                                                                                                |
|--------------|------------------------------------|-------|--------|---------|----------------------------------------------------------------------------------------------------------------------|
| KEGG_PATHWAY | xtr04310:Wnt signaling pathway     | 17    | 0.0335 | 0.00261 | DVL2,CSNK1A1,FZD8,PPP2R5A,TP53,PPP3R1,CSNK2B,WNT7B,<br>RAC2,SFRP2,PPP3CB,CAMK2D,SIAH1,PPP2R5E,CAMK2A,CUL1<br>,NFATC1 |
| KEGG_PATHWAY | xtr04210:Apoptosis                 | 12    | 0.0237 | 0.00376 | BID,IRAK2,IRAK1,CASP6,CASP3,AIFM1,CASP7,PPP3CB,TP53,P<br>PP3R1,BCL2L1,CAPN2                                          |
| KEGG_PATHWAY | xtr00251:Glutamate metabolism      | 6     | 0.0118 | 0.00437 | GOT2,GLUD1,NADSYN1,ALDH4A1,PPAT,EARS2                                                                                |
| KEGG_PATHWAY | xtr00030:Pentose phosphate pathway | 6     | 0.0118 | 0.02249 | G6PD,TALDO1,PFKP,DERA,PRPS2                                                                                          |
